# Supplementary material for: Paternity Uncertainty or Male Dominance? Paternal versus Maternal Grandmothers’ Contribution to Children’s Schooling in Sub-Saharan Africa
Source: Springer Nature journal article supplement (doi:10.1007/s10826-019-01632-0), 2019-10-24
Supplement: MOESM1 [file 17307094]

## Supplementary Materials

DHS country data, year of survey(s) and household response rates

| <b>Country</b>    | <b>Year(s)</b>   | <b>HH Resp. rate (%)</b> |
|-------------------|------------------|--------------------------|
| Benin             | 2001, 2006, 2011 | 97.0, 99.1, 98.6         |
| Burkina Faso      | 2003, 2010       | 99.4, 99.2               |
| Burundi           | 2010             | 99.1                     |
| Cameroon          | 2004, 2011       | 97.6, 99.0               |
| Chad              | 2004             | 99.4                     |
| Cote d'Ivoire     | 2005, 2011       | 95.5, 98.1               |
| Congo DR          | 2007, 2013       | 99.3, 99.9               |
| Congo Brazzaville | 2005, 2011       | 99.2, 99.8               |
| Ethiopia          | 2000, 2005, 2011 | 99.3, 98.5, 98.1         |
| Gabon             | 2000, 2012       | 97.6, 99.3               |
| Ghana             | 2003, 2008       | 98.7, 98.9               |
| Guinea            | 2005, 2012       | 99.2, 99.5               |
| Kenya             | 2003, 2008       | 96.3, 97.7               |
| Lesotho           | 2004, 2010       | 95.2, 97.6               |
| Liberia           | 2007, 2013       | 97.2, 99.4               |
| Madagascar        | 2004, 2009       | 97.8, 98.8               |
| Malawi            | 2000, 2004, 2010 | 99.0, 97.8, 98.1         |
| Mali              | 2001, 2006, 2013 | 97.9, 98.8, 98.4         |
| Mauritania        | 2001             | 98.4                     |
| Mozambique        | 2003, 2011       | 80.6, 99.8               |
| Namibia           | 2000, 2006, 2013 | 96.9, 97.8, 96.9         |
| Niger             | 2006, 2012       | 98.0, 98.0               |
| Nigeria           | 2003, 2008       | 98.6, 98.3, 99.0         |
| Rwanda            | 2000, 2005, 2010 | 99.7, 99.7, 99.8         |
| Senegal           | 2005, 2011, 2012 | 98.5, 98.4, 98.7         |
| Sierra Leone      | 2008, 2013       | 97.6, 99.3               |
| South Africa      | 1998             | 97.0                     |
| Swaziland         | 2006             | 95.2                     |
| Tanzania          | 2004, 2010       | 98.8, 98.8               |
| Togo              | 1998             | 98.6                     |
| Uganda            | 2001, 2006, 2011 | 95.8, 95.3, 97.5         |
| Zambia            | 2002, 2007       | 98.2, 97.8               |
| Zimbabwe          | 2006, 2011       | 95.0, 96.0               |
